# Supplementary material for: Effects of golf course management on subsurface soil properties in Iowa
Source: Copernicus journal article supplement (doi:10.5194/soil-4-93-2018), 2018-05-03
Supplement: Supplementary file 1 [file soil-4-93-2018-supplement.zip]

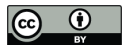

## *Supplement of*

# **Effects of golf course management on subsurface soil properties in Iowa**

**Matthew T. Streeter and Keith E. Schilling**

*Correspondence to:* Matthew T. Streeter ([matthew-streeter@uiowa.edu](mailto:matthew-streeter@uiowa.edu))

- [soil-4-93-2018-supplement-title-page.pdf](#)
- [Soil Data.xlsx](#)

The copyright of individual parts of the supplement might differ from the CC BY 4.0 License.
